# Supplementary material for: Computational strategies for the preconditioned conjugate gradient method applied to ssSNPBLUP, with an application to a multivariate maternal model
Source: PubMed Central journal article supplement (PMC7222437; doi:10.1186/s12711-020-00543-9), 2020-05-13
Supplement: 12711_2020_543_MOESM2_ESM.pdf [file 12711_2020_543_MOESM2_ESM.pdf]

## Additional file 2: Description of the system of equations of ssSNPBLUP\_MS for a bivariate maternal model

A standard bivariate maternal model associated with the ssSNPBLUP\_MS system of equations can be written as (ignoring the permanent environmental effects):

$$\mathbf{y} = \mathbf{X}\boldsymbol{\beta} + \begin{bmatrix} \mathbf{W}_n & \mathbf{0} \\ \mathbf{0} & \mathbf{W}_g \end{bmatrix} \begin{bmatrix} \mathbf{u}_n \\ \mathbf{a}_g \end{bmatrix} + \begin{bmatrix} \mathbf{0} \\ \mathbf{W}_g \mathbf{M}_z \end{bmatrix} \mathbf{g} + \begin{bmatrix} \mathbf{S}_n & \mathbf{0} \\ \mathbf{0} & \mathbf{S}_g \end{bmatrix} \begin{bmatrix} \mathbf{m}_n \\ \mathbf{q}_g \end{bmatrix} + \begin{bmatrix} \mathbf{0} \\ \mathbf{S}_g \mathbf{M}_z \end{bmatrix} \mathbf{g}_m + \mathbf{e}$$

where the subscripts  $g$  and  $n$  refer to genotyped and non-genotyped animals, respectively,  $\mathbf{y} = \begin{bmatrix} \mathbf{y}_{n,1} \\ \mathbf{y}_{n,2} \\ \mathbf{y}_{g,1} \\ \mathbf{y}_{g,2} \end{bmatrix}$

is the vector of records (with the subscripts 1 and 2 referring to the first and the second trait, respectively),  $\boldsymbol{\beta} = \begin{bmatrix} \boldsymbol{\beta}_{n,1} \\ \boldsymbol{\beta}_{n,2} \\ \boldsymbol{\beta}_{g,1} \\ \boldsymbol{\beta}_{g,2} \end{bmatrix}$  is the vector of fixed effects,  $\mathbf{u}_n = \begin{bmatrix} \mathbf{u}_{n,1} \\ \mathbf{u}_{n,2} \end{bmatrix}$  is the vector of direct genetic effects

for non-genotyped animals,  $\mathbf{a}_g = \begin{bmatrix} \mathbf{a}_{g,1} \\ \mathbf{a}_{g,2} \end{bmatrix}$  is the vector of direct residual polygenic effects for genotyped animals,  $\mathbf{g} = \begin{bmatrix} \mathbf{g}_1 \\ \mathbf{g}_2 \end{bmatrix}$  is the vector of SNP effects for the direct genetic effects,  $\mathbf{m}_n = \begin{bmatrix} \mathbf{m}_{n,1} \\ \mathbf{m}_{n,2} \end{bmatrix}$  is the vector of maternal genetic effects for non-genotyped animals,  $\mathbf{q}_g = \begin{bmatrix} \mathbf{q}_{g,1} \\ \mathbf{q}_{g,2} \end{bmatrix}$  is the vector of maternal residual polygenic effects for genotyped animals,  $\mathbf{g}_m = \begin{bmatrix} \mathbf{g}_{m,1} \\ \mathbf{g}_{m,2} \end{bmatrix}$  is the vector of SNP effects for the maternal genetic effects, and  $\mathbf{e}$  is the vector of residuals.

The matrices  $\mathbf{X} = \begin{bmatrix} \mathbf{X}_{n,1} & \mathbf{0} \\ \mathbf{0} & \mathbf{X}_{n,2} \\ \mathbf{X}_{g,1} & \mathbf{0} \\ \mathbf{0} & \mathbf{X}_{g,2} \end{bmatrix}$ ,  $\mathbf{W}_n = \begin{bmatrix} \mathbf{W}_{n,1} & \mathbf{0} \\ \mathbf{0} & \mathbf{W}_{n,2} \end{bmatrix}$ ,  $\mathbf{W}_g = \begin{bmatrix} \mathbf{W}_{g,1} & \mathbf{0} \\ \mathbf{0} & \mathbf{W}_{g,2} \end{bmatrix}$ ,  $\mathbf{S}_n = \begin{bmatrix} \mathbf{S}_{n,1} & \mathbf{0} \\ \mathbf{0} & \mathbf{S}_{n,2} \end{bmatrix}$

and  $\mathbf{S}_g = \begin{bmatrix} \mathbf{S}_{g,1} & \mathbf{0} \\ \mathbf{0} & \mathbf{S}_{g,2} \end{bmatrix}$  are incidence matrices relating records to their corresponding effects.

The matrix  $\mathbf{M}_z$  is equal to  $\mathbf{M}_z = \mathbf{I}_2 \otimes \mathbf{Z}$ , with  $\mathbf{I}_2$  being an identity matrix with size equal to the number of traits (i.e. 2) and the matrix  $\mathbf{Z}$  containing the SNP genotypes (coded as 0 for one homozygous genotype, 1 for the heterozygous genotype, or 2 for the alternate homozygous genotype) centred by their observed means.



Following the Eq. (2) in the main text, the matrix  $\mathbf{T}$  becomes  $\mathbf{T} = \begin{bmatrix} \mathbf{I} & & & & & & & \\ \mathbf{0} & \mathbf{I} & & & & & & \\ \mathbf{0} & \mathbf{0} & \mathbf{I} & & & & & \\ \mathbf{0} & \mathbf{0} & \mathbf{0} & \mathbf{I} & & & & \\ \mathbf{0} & \mathbf{0} & \mathbf{0} & \mathbf{0} & \mathbf{I} & & & \\ \mathbf{0} & \mathbf{0} & \mathbf{0} & \mathbf{0} & \mathbf{0} & \mathbf{M}_z & & \\ \mathbf{0} & \mathbf{M}_z \end{bmatrix}$ .

It follows that the matrix  $\mathbf{C}_{MSLS}$  in the Eq. (2) is equal to

$$\mathbf{C}_{MSLS} = \begin{bmatrix} \mathbf{X}'\mathbf{R}^{-1}\mathbf{X} & & & & & & & & \\ \mathbf{W}'_n\mathbf{R}_n^{-1}\mathbf{X}_n & \mathbf{W}'_n\mathbf{R}_n^{-1}\mathbf{W}_n & & & & & & & \\ \mathbf{W}'_g\mathbf{R}_g^{-1}\mathbf{X}_g & \mathbf{W}'_g\mathbf{R}_g^{-1}\mathbf{W}_g & & & & & & & \\ \mathbf{S}'_n\mathbf{R}_n^{-1}\mathbf{X}_n & \mathbf{S}'_n\mathbf{R}_n^{-1}\mathbf{W}_n & \mathbf{S}'_n\mathbf{R}_n^{-1}\mathbf{W}_g & \mathbf{S}'_n\mathbf{R}_n^{-1}\mathbf{S}_n & & & & & \\ \mathbf{S}'_g\mathbf{R}_g^{-1}\mathbf{X}_g & \mathbf{S}'_g\mathbf{R}_g^{-1}\mathbf{W}_n & \mathbf{S}'_g\mathbf{R}_g^{-1}\mathbf{W}_g & \mathbf{S}'_g\mathbf{R}_g^{-1}\mathbf{S}_n & \mathbf{S}'_g\mathbf{R}_g^{-1}\mathbf{S}_g & & & & \\ \mathbf{W}'_g\mathbf{R}_g^{-1}\mathbf{X}_g & \mathbf{W}'_g\mathbf{R}_g^{-1}\mathbf{W}_n & \mathbf{W}'_g\mathbf{R}_g^{-1}\mathbf{W}_g & \mathbf{W}'_g\mathbf{R}_g^{-1}\mathbf{S}_n & \mathbf{W}'_g\mathbf{R}_g^{-1}\mathbf{S}_g & \mathbf{W}'_g\mathbf{R}_g^{-1}\mathbf{W}_g & & & \\ \mathbf{S}'_g\mathbf{R}_g^{-1}\mathbf{X}_g & \mathbf{S}'_g\mathbf{R}_g^{-1}\mathbf{W}_n & \mathbf{S}'_g\mathbf{R}_g^{-1}\mathbf{W}_g & \mathbf{S}'_g\mathbf{R}_g^{-1}\mathbf{S}_n & \mathbf{S}'_g\mathbf{R}_g^{-1}\mathbf{S}_g & \mathbf{S}'_g\mathbf{R}_g^{-1}\mathbf{W}_g & \mathbf{S}'_g\mathbf{R}_g^{-1}\mathbf{S}_g & & \end{bmatrix},$$

that the matrix  $\mathbf{C}_{MSR1}$  in the Eq. (2) is equal to

$$\mathbf{C}_{MSR1} = \begin{bmatrix} \mathbf{0} & & & & & & & & & & \\ \mathbf{0} & \mathbf{0} & & & & & & & & & \\ \mathbf{0} & \mathbf{0} & \mathbf{G}^{uu} \otimes \left( \left( 1 - \frac{1}{w} \right) \mathbf{Q} \right) & & & & & & & & \\ \mathbf{0} & \mathbf{0} & \mathbf{0} & \mathbf{0} & & & & & & & \\ \mathbf{0} & \mathbf{0} & \mathbf{G}^{mu} \otimes \left( \left( 1 - \frac{1}{w} \right) \mathbf{Q} \right) & \mathbf{0} & \mathbf{G}^{mm} \otimes \left( \left( 1 - \frac{1}{w} \right) \mathbf{Q} \right) & & & & & & \\ \mathbf{0} & \mathbf{G}^{uu} \otimes \mathbf{A}^{gn} & \mathbf{G}^{uu} \otimes \mathbf{Q} & \mathbf{G}^{um} \otimes \mathbf{A}^{gn} & \mathbf{G}^{um} \otimes \mathbf{Q} & & \mathbf{G}^{uu} \otimes \mathbf{Q} & & & & \\ \mathbf{0} & \mathbf{G}^{mu} \otimes \mathbf{A}^{gn} & \mathbf{G}^{mu} \otimes \mathbf{Q} & \mathbf{G}^{mm} \otimes \mathbf{A}^{gn} & \mathbf{G}^{mm} \otimes \mathbf{Q} & & \mathbf{G}^{mu} \otimes \mathbf{Q} & \mathbf{G}^{mm} \otimes \mathbf{Q} & & & \end{bmatrix}$$

and that the matrix  $\mathbf{C}_{MSR2}$  in the Eq. (2) is equal to

$$\mathbf{C}_{MSR2} = \begin{bmatrix} \mathbf{0} & & & & & & & & & & \\ \mathbf{0} & \mathbf{G}^{uu} \otimes \mathbf{A}^{nn} & & & & & & & & & \\ \mathbf{0} & \mathbf{G}^{uu} \otimes \mathbf{A}^{gn} & \mathbf{G}^{uu} \otimes \frac{1}{w} \mathbf{A}^{gg} & & & & & & & & \\ \mathbf{0} & \mathbf{G}^{mu} \otimes \mathbf{A}^{nn} & \mathbf{G}^{mu} \otimes \mathbf{A}^{ng} & \mathbf{G}^{mm} \otimes \mathbf{A}^{nn} & & & & & & & \\ \mathbf{0} & \mathbf{G}^{mu} \otimes \mathbf{A}^{gn} & \mathbf{G}^{mu} \otimes \frac{1}{w} \mathbf{A}^{gg} & \mathbf{G}^{mm} \otimes \mathbf{A}^{gn} & \mathbf{G}^{mm} \otimes \frac{1}{w} \mathbf{A}^{gg} & & & & & & \\ \mathbf{0} & \mathbf{0} & \mathbf{0} & \mathbf{0} & \mathbf{0} & \mathbf{0} & \mathbf{G}^{uu} \otimes \left( \frac{m}{1-w} \mathbf{I} \right) & & & & \\ \mathbf{0} & \mathbf{0} & \mathbf{0} & \mathbf{0} & \mathbf{0} & \mathbf{0} & \mathbf{G}^{mu} \otimes \left( \frac{m}{1-w} \mathbf{I} \right) & \mathbf{G}^{mm} \otimes \left( \frac{m}{1-w} \mathbf{I} \right) & & & \end{bmatrix}$$

With the matrices  $\mathbf{C}_{MSLS}$ ,  $\mathbf{C}_{MSR1}$ , and  $\mathbf{C}_{MSR2}$  being defined, the multiplication of the coefficient matrix  $\mathbf{C}$ , associated with a bivariate maternal ssSNPBLUP\_MS, by a vector can be performed as proposed in the main text. For example, the multiplication of  $\mathbf{C}_{MSLS}$  by a vector can be performed with approaches already developed in animal breeding, such as iteration-on-data approaches [16-19]. Indeed,

the block matrix  $\begin{bmatrix} \mathbf{X}'\mathbf{R}^{-1}\mathbf{X} & & & & & & & & \\ \mathbf{W}'_n\mathbf{R}_n^{-1}\mathbf{X}_n & \mathbf{W}'_n\mathbf{R}_n^{-1}\mathbf{W}_n & & & & & & & \\ \mathbf{W}'_g\mathbf{R}_g^{-1}\mathbf{X}_g & \mathbf{W}'_g\mathbf{R}_g^{-1}\mathbf{W}_n & \mathbf{W}'_g\mathbf{R}_g^{-1}\mathbf{W}_g & & & & & & \\ \mathbf{S}'_n\mathbf{R}_n^{-1}\mathbf{X}_n & \mathbf{S}'_n\mathbf{R}_n^{-1}\mathbf{W}_n & \mathbf{S}'_n\mathbf{R}_n^{-1}\mathbf{W}_g & \mathbf{S}'_n\mathbf{R}_n^{-1}\mathbf{S}_n & & & & & \\ \mathbf{S}'_g\mathbf{R}_g^{-1}\mathbf{X}_g & \mathbf{S}'_g\mathbf{R}_g^{-1}\mathbf{W}_n & \mathbf{S}'_g\mathbf{R}_g^{-1}\mathbf{W}_g & \mathbf{S}'_g\mathbf{R}_g^{-1}\mathbf{S}_n & \mathbf{S}'_g\mathbf{R}_g^{-1}\mathbf{S}_g & & & & \end{bmatrix}$  extracted from

$\mathbf{C}_{MSLS}$  is equal to the least-squares part of the coefficient matrix of a system of equations associated with a traditional pedigree BLUP based on the same model and datasets [19].
