# Supplementary material for: Computational strategies for the preconditioned conjugate gradient method applied to ssSNPBLUP, with an application to a multivariate maternal model
Source: PubMed Central journal article supplement (PMC7222437; doi:10.1186/s12711-020-00543-9), 2020-05-13
Supplement: 12711_2020_543_MOESM3_ESM.pdf [file 12711_2020_543_MOESM3_ESM.pdf]

## Additional file 3: Derivation of an alternative computation of $\mathbf{A}^{gn} (\mathbf{A}^{nn})^{-1} \mathbf{A}^{ng}$

Let the inverse of the pedigree relationship matrix of all animals in the pedigree,  $\mathbf{A}^{-1}$ , be partitioned between the genotyped animals  $g$ , and the non-genotyped animals  $n$ :

$$\mathbf{A}^{-1} = \begin{bmatrix} \mathbf{A}^{nn} & \mathbf{A}^{ng} \\ \mathbf{A}^{gn} & \mathbf{A}^{gg} \end{bmatrix}.$$

Let the inverse of the pedigree relationship matrix of all genotyped animals and their ancestors,  $\mathbf{A}_{anc}^{-1}$ , be partitioned between the genotyped animals  $g$ , and the non-genotyped ancestors of the genotyped animals:

$$\mathbf{A}_{anc}^{-1} = \begin{bmatrix} \mathbf{A}_{anc,nn} & \mathbf{A}_{anc,ng} \\ \mathbf{A}_{anc,gn} & \mathbf{A}_{anc,gg} \end{bmatrix}^{-1} = \begin{bmatrix} \mathbf{A}_{anc}^{nn} & \mathbf{A}_{anc}^{ng} \\ \mathbf{A}_{anc}^{gn} & \mathbf{A}_{anc}^{gg} \end{bmatrix}.$$

It is worth noting that a non-genotyped ancestor can be an offspring of a genotyped animal.

The inverse of the pedigree relationship matrix among genotyped animals  $g$  is then equal to:

$$\mathbf{A}_{gg}^{-1} = \mathbf{A}^{gg} - \mathbf{A}^{gn} (\mathbf{A}^{nn})^{-1} \mathbf{A}^{ng} = \mathbf{A}_{anc}^{gg} - \mathbf{A}_{anc}^{gn} (\mathbf{A}_{anc}^{nn})^{-1} \mathbf{A}_{anc}^{ng}$$

Therefore, it follows that:

$$\begin{aligned} \mathbf{Q} &= \mathbf{A}^{gn} (\mathbf{A}^{nn})^{-1} \mathbf{A}^{ng} \\ &= \mathbf{A}_{anc}^{gn} (\mathbf{A}_{anc}^{nn})^{-1} \mathbf{A}_{anc}^{ng} + \mathbf{A}^{gg} - \mathbf{A}_{anc}^{gg} \\ &= \mathbf{A}_{anc}^{gn} (\mathbf{A}_{anc}^{nn})^{-1} \mathbf{A}_{anc}^{ng} + \mathbf{\Delta} \end{aligned}$$

From Henderson's rules to construct directly the inverse of a pedigree relationship matrix  $\mathbf{A}^{-1}$  [22], adding the contribution of an animal to  $\mathbf{A}^{-1}$  will modify at most for 9 entries of  $\mathbf{A}^{-1}$ : three diagonal elements of  $\mathbf{A}^{-1}$  corresponding to the entries of the animal, its sire, and its dam, four off-diagonal elements of  $\mathbf{A}^{-1}$  corresponding to the entries between the animal and its sire or its dam, and two off-diagonal elements of  $\mathbf{A}^{-1}$  corresponding to the entries between its sire and its dam.

Therefore, only the genotyped animals and their non-genotyped offspring that are also ancestors of genotyped animals, contribute to  $\mathbf{A}_{anc}^{gg}$ , and only the genotyped animals and all their non-genotyped offspring contribute to  $\mathbf{A}^{gg}$ . It follows that the difference between  $\mathbf{A}^{gg}$  and  $\mathbf{A}_{anc}^{gg}$ ,  $\mathbf{\Delta}$ , is only due to the contributions to  $\mathbf{A}^{-1}$  of the non-genotyped offspring of the genotyped animals that are not ancestors of genotyped animals. The matrix  $\mathbf{\Delta}$  can be then easily

and directly constructed using Henderson's rules by reading the pedigree only once.
